# Supplementary material for: Discovery of Pathogenic Variants Associated with Idiopathic Recurrent Pregnancy Loss Using Whole-Exome Sequencing
Source: MDPI journal article supplement (doi:10.3390/ijms25105447), 2024-05-17
Supplement: s1 [file s1]

**Supplementary Table S1. List of abortion/miscarriage related genes**

| gene symbol | NCBI entrez ID | Gene Name                                                         |
|-------------|----------------|-------------------------------------------------------------------|
| ABCC6       | 368            | ATP binding cassette subfamily C member 6(ABCC6)                  |
| ABHD17B     | 51104          | abhydrolase domain containing 17B, depalmitoylase(ABHD17B)        |
| ACE         | 1636           | angiotensin I converting enzyme(ACE)                              |
| ACE2        | 59272          | angiotensin converting enzyme 2(ACE2)                             |
| ACER2       | 340485         | alkaline ceramidase 2(ACER2)                                      |
| ACKR4       | 51554          | atypical chemokine receptor 4(ACKR4)                              |
| ACO1        | 48             | aconitase 1(ACO1)                                                 |
| ACP1        | 52             | acid phosphatase 1(ACP1)                                          |
| ADAMTSL1    | 92949          | ADAMTS like 1(ADAMTSL1)                                           |
| AGTPBP1     | 23287          | ATP/GTP binding carboxypeptidase 1(AGTPBP1)                       |
| AGTR1       | 185            | angiotensin II receptor type 1(AGTR1)                             |
| AHR         | 196            | aryl hydrocarbon receptor(AHR)                                    |
| ALB         | 213            | albumin(ALB)                                                      |
| ALDH1A1     | 216            | aldehyde dehydrogenase 1 family member A1(ALDH1A1)                |
| ALDH1B1     | 219            | aldehyde dehydrogenase 1 family member B1(ALDH1B1)                |
| ALPG        | 251            | alkaline phosphatase, germ cell(ALPG)                             |
| ANKRD18A    | 253650         | ankyrin repeat domain 18A(ANKRD18A)                               |
| ANKRD18B    | 441459         | ankyrin repeat domain 18B(ANKRD18B)                               |
| ANKRD20A1   | 84210          | ankyrin repeat domain 20 family member A1(ANKRD20A1)              |
| ANKS6       | 203286         | ankyrin repeat and sterile alpha motif domain containing 6(ANKS6) |
| ANP32B      | 10541          | acidic nuclear phosphoprotein 32 family member B(ANP32B)          |
| ANXA1       | 301            | annexin A1(ANXA1)                                                 |
| ANXA5       | 308            | annexin A5(ANXA5)                                                 |
| AOPEP       | 84909          | aminopeptidase O (putative)(AOPEP)                                |
| APBA1       | 320            | amyloid beta precursor protein binding family A member 1(APBA1)   |
| APOE        | 348            | apolipoprotein E(APOE)                                            |
| APTX        | 54840          | aprataxin(APTX)                                                   |
| AQP3        | 360            | aquaporin 3 (Gill blood group)(AQP3)                              |
| AQP7        | 364            | aquaporin 7(AQP7)                                                 |
| AR          | 367            | androgen receptor(AR)                                             |
| ARHGEF39    | 84904          | Rho guanine nucleotide exchange factor 39(ARHGEF39)               |
| ARID3C      | 138715         | AT-rich interaction domain 3C(ARID3C)                             |
| ARNT        | 405            | aryl hydrocarbon receptor nuclear translocator(ARNT)              |
| ASPH        | 444            | aspartate beta-hydroxylase(ASPH)                                  |
| ASPN        | 54829          | asporin(ASPN)                                                     |
| ATOSB       | 80256          | atos homolog B(ATOSB)                                             |
| AUH         | 549            | AU RNA binding methylglutaconyl-CoA hydratase(AUH)                |
| B4GALT1     | 2683           | beta-1,4-galactosyltransferase 1(B4GALT1)                         |

|             |           |                                                        |
|-------------|-----------|--------------------------------------------------------|
| BAG1        | 573       | BAG cochaperone 1(BAG1)                                |
| BANCR       | 100885775 | BRAF-activated non-protein coding RNA(BANCR)           |
| BARX1       | 56033     | BARX homeobox 1(BARX1)                                 |
| BICD2       | 23299     | BICD cargo adaptor 2(BICD2)                            |
| BIN1        | 274       | bridging integrator 1(BIN1)                            |
| BNC2        | 54796     | basonuclin 2(BNC2)                                     |
| C11ORF80    | 79703     | chromosome 11 open reading frame 80(C11orf80)          |
| C9ORF131    | 138724    | chromosome 9 open reading frame 131(C9orf131)          |
| C9ORF153    | 389766    | chromosome 9 open reading frame 153(C9orf153)          |
| C9ORF24     | 84688     | chromosome 9 open reading frame 24(C9orf24)            |
| C9ORF40     | 55071     | chromosome 9 open reading frame 40(C9orf40)            |
| C9ORF57     | 138240    | chromosome 9 open reading frame 57(C9orf57)            |
| C9ORF64     | 84267     | Q-nucleotide N-glycosylase 1(QNG1)                     |
| C9ORF72     | 203228    | C9orf72-SMCR8 complex subunit(C9orf72)                 |
| C9ORF85     | 138241    | chromosome 9 open reading frame 85(C9orf85)            |
| CA9         | 768       | carbonic anhydrase 9(CA9)                              |
| CAAP1       | 79886     | caspase activity and apoptosis inhibitor 1(CAAP1)      |
| CARD19      | 84270     | caspase recruitment domain family member 19(CARD19)    |
| CARNMT1     | 138199    | carnosine N-methyltransferase 1(CARNMT1)               |
| CARNMT1-AS1 | 101927380 | CARNMT1 antisense RNA 1(CARNMT1-AS1)                   |
| CBWD5       | 445571    | Zn regulated GTPase metalloprotein activator 1C(ZNG1C) |
| CBWD5       | 220869    | Zn regulated GTPase metalloprotein activator 1E(ZNG1E) |
| CBX3        | 11335     | chromobox 3(CBX3)                                      |
| CCDC103     | 388389    | coiled-coil domain containing 103(CCDC103)             |
| CCDC107     | 203260    | coiled-coil domain containing 107(CCDC107)             |
| CCDC171     | 203238    | coiled-coil domain containing 171(CCDC171)             |
| CCDC180     | 100499483 | coiled-coil domain containing 180(CCDC180)             |
| CCDC39      | 339829    | coiled-coil domain containing 39(CCDC39)               |
| CCDC40      | 55036     | coiled-coil domain containing 40(CCDC40)               |
| CCDC65      | 85478     | coiled-coil domain containing 65(CCDC65)               |
| CCDC68      | 80323     | coiled-coil domain containing 68(CCDC68)               |
| CCIN        | 881       | calicin(CCIN)                                          |
| CCL19       | 6363      | C-C motif chemokine ligand 19(CCL19)                   |
| CCL21       | 6366      | C-C motif chemokine ligand 21(CCL21)                   |
| CCL27       | 10850     | C-C motif chemokine ligand 27(CCL27)                   |
| CCNB3       | 85417     | cyclin B3(CCNB3)                                       |
| CCNO        | 10309     | cyclin O(CCNO)                                         |
| CD163       | 9332      | CD163 molecule(CD163)                                  |
| CD164       | 8763      | CD164 molecule(CD164)                                  |
| CD226       | 10666     | CD226 molecule(CD226)                                  |
| CD68        | 968       | CD68 molecule(CD68)                                    |

|            |           |                                                         |
|------------|-----------|---------------------------------------------------------|
| CD69       | 969       | CD69 molecule(CD69)                                     |
| CD7        | 924       | CD7 molecule(CD7)                                       |
| CD72       | 971       | CD72 molecule(CD72)                                     |
| CD82       | 3732      | CD82 molecule(CD82)                                     |
| CD84       | 8832      | CD84 molecule(CD84)                                     |
| CD8A       | 925       | CD8 subunit alpha(CD8A)                                 |
| CDC14B     | 8555      | cell division cycle 14B(CDC14B)                         |
| CDK20      | 23552     | cyclin dependent kinase 20(CDK20)                       |
| CDKN2A     | 1029      | cyclin dependent kinase inhibitor 2A(CDKN2A)            |
| CDKN2B     | 1030      | cyclin dependent kinase inhibitor 2B(CDKN2B)            |
| CDKN2B-AS1 | 100048912 | CDKN2B antisense RNA 1(CDKN2B-AS1)                      |
| CEACAM1    | 634       | CEA cell adhesion molecule 1(CEACAM1)                   |
| CEACAM5    | 1048      | CEA cell adhesion molecule 5(CEACAM5)                   |
| CEACAM6    | 4680      | CEA cell adhesion molecule 6(CEACAM6)                   |
| CEMIP2     | 23670     | cell migration inducing hyaluronidase 2(CEMIP2)         |
| CENPH      | 64946     | centromere protein H(CENPH)                             |
| CENPP      | 401541    | centromere protein P(CENPP)                             |
| CEP78      | 84131     | centrosomal protein 78(CEP78)                           |
| CER1       | 9350      | cerberus 1, DAN family BMP antagonist(CER1)             |
| CER1       | 23739     | chromosome 3 common eliminated region 1(C3CER1)         |
| CFAP298    | 56683     | cilia and flagella associated protein 298(CFAP298)      |
| CFAP300    | 85016     | cilia and flagella associated protein 300(CFAP300)      |
| CFAP95     | 138255    | cilia and flagella associated protein 95(CFAP95)        |
| CHIA       | 27159     | chitinase acidic(CHIA)                                  |
| CHMP5      | 51510     | charged multivesicular body protein 5(CHMP5)            |
| CKS2       | 1164      | CDC28 protein kinase regulatory subunit 2(CKS2)         |
| CLTA       | 1211      | clathrin light chain A(CLTA)                            |
| CNTFR      | 1271      | ciliary neurotrophic factor receptor(CNTFR)             |
| CNTLN      | 54875     | centlein(CNTLN)                                         |
| CNTNAP3    | 79937     | contactin associated protein family member 3(CNTNAP3)   |
| CNTNAP3B   | 728577    | contactin associated protein family member 3B(CNTNAP3B) |
| COL13A1    | 1305      | collagen type XIII alpha 1 chain(COL13A1)               |
| COL1A1     | 1277      | collagen type I alpha 1 chain(COL1A1)                   |
| COL1A2     | 1278      | collagen type I alpha 2 chain(COL1A2)                   |
| COL4A6     | 1288      | collagen type IV alpha 6 chain(COL4A6)                  |
| COL5A1     | 1289      | collagen type V alpha 1 chain(COL5A1)                   |
| COL5A2     | 1290      | collagen type V alpha 2 chain(COL5A2)                   |
| COL6A1     | 1291      | collagen type VI alpha 1 chain(COL6A1)                  |
| COL6A3     | 1293      | collagen type VI alpha 3 chain(COL6A3)                  |
| COL9A2     | 1298      | collagen type IX alpha 2 chain(COL9A2)                  |
| CORO2A     | 7464      | coronin 2A(CORO2A)                                      |

|            |           |                                                            |
|------------|-----------|------------------------------------------------------------|
| CREB3      | 10488     | cAMP responsive element binding protein 3(CREB3)           |
| CRISP3     | 10321     | cysteine rich secretory protein 3(CRISP3)                  |
| CSF3       | 1440      | colony stimulating factor 3(CSF3)                          |
| CSRNP3     | 80034     | cysteine and serine rich nuclear protein 3(CSRNP3)         |
| CTSL       | 1514      | cathepsin L(CTSL)                                          |
| CTSV       | 1515      | cathepsin V(CTSV)                                          |
| CXCL10     | 3627      | C-X-C motif chemokine ligand 10(CXCL10)                    |
| CYP1A1     | 1543      | cytochrome P450 family 1 subfamily A member 1(CYP1A1)      |
| CYP1B1     | 1545      | cytochrome P450 family 1 subfamily B member 1(CYP1B1)      |
| CYP24A1    | 1591      | cytochrome P450 family 24 subfamily A member 1(CYP24A1)    |
| DAPK1      | 1612      | death associated protein kinase 1(DAPK1)                   |
| DAPK1-IT1  | 100506897 | DAPK1 intronic transcript 1(DAPK1-IT1)                     |
| DCAF10     | 79269     | DDB1 and CUL4 associated factor 10(DCAF10)                 |
| DCAF12     | 25853     | DDB1 and CUL4 associated factor 12(DCAF12)                 |
| DCTN3      | 11258     | dynactin subunit 3(DCTN3)                                  |
| DDX58      | 23586     | RNA sensor RIG-I(RIGI)                                     |
| DENND4C    | 55667     | DENN domain containing 4C(DENND4C)                         |
| DHFR       | 1719      | dihydrofolate reductase(DHFR)                              |
| DHFR       | 573971    | dihydrofolate reductase pseudogene 1(DHFRP1)               |
| DIAPH2-AS1 | 10824     | DIAPH2 antisense RNA 1(DIAPH2-AS1)                         |
| DIRAS2     | 54769     | DIRAS family GTPase 2(DIRAS2)                              |
| DMRTA1     | 63951     | DMRT like family A1(DMRTA1)                                |
| DNAAF1     | 123872    | dynein axonemal assembly factor 1(DNAAF1)                  |
| DNAAF11    | 23639     | dynein axonemal assembly factor 11(DNAAF11)                |
| DNAAF2     | 55172     | dynein axonemal assembly factor 2(DNAAF2)                  |
| DNAAF3     | 352909    | dynein axonemal assembly factor 3(DNAAF3)                  |
| DNAAF4     | 161582    | dynein axonemal assembly factor 4(DNAAF4)                  |
| DNAAF5     | 54919     | dynein axonemal assembly factor 5(DNAAF5)                  |
| DNAAF6     | 139212    | dynein axonemal assembly factor 6(DNAAF6)                  |
| DNAH1      | 25981     | dynein axonemal heavy chain 1(DNAH1)                       |
| DNAH11     | 8701      | dynein axonemal heavy chain 11(DNAH11)                     |
| DNAH5      | 1767      | dynein axonemal heavy chain 5(DNAH5)                       |
| DNAI1      | 27019     | dynein axonemal intermediate chain 1(DNAI1)                |
| DNAI2      | 64446     | dynein axonemal intermediate chain 2(DNAI2)                |
| DNAJA1     | 3301      | DnaJ heat shock protein family (Hsp40) member A1(DNAJA1)   |
| DNAJB13    | 374407    | DnaJ heat shock protein family (Hsp40) member B13(DNAJB13) |
| DNAJB5     | 25822     | DnaJ heat shock protein family (Hsp40) member B5(DNAJB5)   |
| DNAL1      | 83544     | dynein axonemal light chain 1(DNAL1)                       |
| DNM2       | 1785      | dynammin 2(DNM2)                                           |
| DRC1       | 92749     | dynein regulatory complex subunit 1(DRC1)                  |
| ECM1       | 1893      | extracellular matrix protein 1(ECM1)                       |

|           |        |                                                                 |
|-----------|--------|-----------------------------------------------------------------|
| ECM2      | 1842   | extracellular matrix protein 2(ECM2)                            |
| ELAVL2    | 1993   | ELAV like RNA binding protein 2(ELAVL2)                         |
| EMP1      | 2012   | epithelial membrane protein 1(EMP1)                             |
| ENG       | 2022   | endoglin(ENG)                                                   |
| ENHO      | 375704 | energy homeostasis associated(ENHO)                             |
| ENPP1     | 5167   | ectonucleotide pyrophosphatase/phosphodiesterase 1(ENPP1)       |
| ENTREP1   | 9413   | endosomal transmembrane epsin interactor 1(ENTREP1)             |
| EQTN      | 54586  | equatorin(EQTN)                                                 |
| ERCC6L2   | 375748 | ERCC excision repair 6 like 2(ERCC6L2)                          |
| EXOSC3    | 51010  | exosome component 3(EXOSC3)                                     |
| F13A1     | 2162   | coagulation factor XIII A chain(F13A1)                          |
| F13B      | 2165   | coagulation factor XIII B chain(F13B)                           |
| F2        | 2147   | coagulation factor II, thrombin(F2)                             |
| F5        | 2153   | coagulation factor V(F5)                                        |
| FAM120A   | 23196  | family with sequence similarity 120A(FAM120A)                   |
| FAM120AOS | 158293 | family with sequence similarity 120A opposite strand(FAM120AOS) |
| FAM166B   | 730112 | family with sequence similarity 166 member B(FAM166B)           |
| FAM205A   | 259308 | SPATA31 subfamily F member 1(SPATA31F1)                         |
| FAM219A   | 203259 | family with sequence similarity 219 member A(FAM219A)           |
| FAM221B   | 392307 | family with sequence similarity 221 member B(FAM221B)           |
| FAM27D1   | 724094 | family with sequence similarity 27 member D1(FAM27D1)           |
| FANCC     | 2176   | FA complementation group C(FANCC)                               |
| FANCG     | 2189   | FA complementation group G(FANCG)                               |
| FBP1      | 2203   | fructose-bisphosphatase 1(FBP1)                                 |
| FBP2      | 8789   | fructose-bisphosphatase 2(FBP2)                                 |
| FBXO10    | 26267  | F-box protein 10(FBXO10)                                        |
| FETUB     | 26998  | fetuin B(FETUB)                                                 |
| FGA       | 2243   | fibrinogen alpha chain(FGA)                                     |
| FGB       | 2244   | fibrinogen beta chain(FGB)                                      |
| FGD3      | 89846  | FYVE, RhoGEF and PH domain containing 3(FGD3)                   |
| FGF7      | 2252   | fibroblast growth factor 7(FGF7)                                |
| FGG       | 2266   | fibrinogen gamma chain(FGG)                                     |
| FLRT3     | 23767  | fibronectin leucine rich transmembrane protein 3(FLRT3)         |
| FN1       | 2335   | fibronectin 1(FN1)                                              |
| FOCAD     | 54914  | focadhesin(FOCAD)                                               |
| FOXB2     | 442425 | forkhead box B2(FOXB2)                                          |
| FOXD4L3   | 286380 | forkhead box D4 like 3(FOXD4L3)                                 |
| FOXD4L4   | 349334 | forkhead box D4 like 4(FOXD4L4)                                 |
| FOXD4L5   | 653427 | forkhead box D4 like 5(FOXD4L5)                                 |
| FOXD4L6   | 653404 | forkhead box D4 like 6(FOXD4L6)                                 |
| FOXE1     | 2304   | forkhead box E1(FOXE1)                                          |

|         |        |                                                                        |
|---------|--------|------------------------------------------------------------------------|
| FREM1   | 158326 | FRAS1 related extracellular matrix 1(FREM1)                            |
| FRMD3   | 257019 | FERM domain containing 3(FRMD3)                                        |
| FRMPD1  | 22844  | FERM and PDZ domain containing 1(FRMPD1)                               |
| FST     | 10468  | follistatin(FST)                                                       |
| FXN     | 2395   | frataxin(FXN)                                                          |
| GABBR2  | 9568   | gamma-aminobutyric acid type B receptor subunit 2(GABBR2)              |
| GADD45G | 10912  | growth arrest and DNA damage inducible gamma(GADD45G)                  |
| GALT    | 2592   | galactose-1-phosphate uridylyltransferase(GALT)                        |
| GAS1    | 2619   | growth arrest specific 1(GAS1)                                         |
| GAS2L2  | 246176 | growth arrest specific 2 like 2(GAS2L2)                                |
| GAS8    | 2622   | growth arrest specific 8(GAS8)                                         |
| GBA2    | 57704  | glucosylceramidase beta 2(GBA2)                                        |
| GCNT1   | 2650   | glucosaminyl (N-acetyl) transferase 1(GCNT1)                           |
| GDA     | 9615   | guanine deaminase(GDA)                                                 |
| GKAP1   | 80318  | G kinase anchoring protein 1(GKAP1)                                    |
| GLIPR2  | 152007 | GLI pathogenesis related 2(GLIPR2)                                     |
| GLS     | 2744   | glutaminase(GLS)                                                       |
| GNA14   | 9630   | G protein subunit alpha 14(GNA14)                                      |
| GNAQ    | 2776   | G protein subunit alpha q(GNAQ)                                        |
| GNE     | 10020  | glucosamine (UDP-N-acetyl)-2-epimerase/N-acetylmannosamine kinase(GNE) |
| GNLY    | 10578  | granulysin(GNLY)                                                       |
| GOLM1   | 51280  | golgi membrane protein 1(GOLM1)                                        |
| GPHN    | 10243  | gephyrin(GPHN)                                                         |
| GRHPR   | 9380   | glyoxylate and hydroxypyruvate reductase(GRHPR)                        |
| HABP2   | 3026   | hyaluronan binding protein 2(HABP2)                                    |
| HABP4   | 22927  | hyaluronan binding protein 4(HABP4)                                    |
| HACD4   | 401494 | 3-hydroxyacyl-CoA dehydratase 4(HACD4)                                 |
| HAUS6   | 54801  | HAUS augmin like complex subunit 6(HAUS6)                              |
| HEMGN   | 55363  | hemogen(HEMGN)                                                         |
| HINT2   | 84681  | histidine triad nucleotide binding protein 2(HINT2)                    |
| HLA-G   | 3135   | major histocompatibility complex, class I, G(HLA-G)                    |
| HNRNPK  | 3190   | heterogeneous nuclear ribonucleoprotein K(HNRNPK)                      |
| HOXA13  | 3209   | homeobox A13(HOXA13)                                                   |
| HRCT1   | 646962 | histidine rich carboxyl terminus 1(HRCT1)                              |
| HSD17B1 | 3292   | hydroxysteroid 17-beta dehydrogenase 1(HSD17B1)                        |
| HSD17B3 | 3293   | hydroxysteroid 17-beta dehydrogenase 3(HSD17B3)                        |
| HTR1A   | 3350   | 5-hydroxytryptamine receptor 1A(HTR1A)                                 |
| HYDIN   | 54768  | HYDIN axonemal central pair apparatus protein(HYDIN)                   |
| IARS1   | 3376   | isoleucyl-tRNA synthetase 1(IARS1)                                     |
| IDNK    | 414328 | IDNK gluconokinase(IDNK)                                               |
| IFI35   | 3430   | interferon induced protein 35(IFI35)                                   |

|         |        |                                                            |
|---------|--------|------------------------------------------------------------|
| IFI44   | 10561  | interferon induced protein 44(IFI44)                       |
| IFI6    | 2537   | interferon alpha inducible protein 6(IFI6)                 |
| IFNA1   | 3447   | interferon alpha 13(IFNA13)                                |
| IFNA1   | 3439   | interferon alpha 1(IFNA1)                                  |
| IFNA10  | 3446   | interferon alpha 10(IFNA10)                                |
| IFNA13  | 3447   | interferon alpha 13(IFNA13)                                |
| IFNA14  | 3448   | interferon alpha 14(IFNA14)                                |
| IFNA16  | 3449   | interferon alpha 16(IFNA16)                                |
| IFNA17  | 3451   | interferon alpha 17(IFNA17)                                |
| IFNA2   | 3440   | interferon alpha 2(IFNA2)                                  |
| IFNA21  | 3452   | interferon alpha 21(IFNA21)                                |
| IFNA4   | 3441   | interferon alpha 4(IFNA4)                                  |
| IFNA5   | 3442   | interferon alpha 5(IFNA5)                                  |
| IFNA6   | 3443   | interferon alpha 6(IFNA6)                                  |
| IFNA7   | 3444   | interferon alpha 7(IFNA7)                                  |
| IFNA8   | 3445   | interferon alpha 8(IFNA8)                                  |
| IFNB1   | 3456   | interferon beta 1(IFNB1)                                   |
| IFNE    | 338376 | interferon epsilon(IFNE)                                   |
| IFNW1   | 3467   | interferon omega 1(IFNW1)                                  |
| IFT74   | 80173  | intraflagellar transport 74(IFT74)                         |
| IGF1    | 3479   | insulin like growth factor 1(IGF1)                         |
| IGF2    | 3481   | insulin like growth factor 2(IGF2)                         |
| IGFBP1  | 3484   | insulin like growth factor binding protein 1(IGFBP1)       |
| IGFBP3  | 3486   | insulin like growth factor binding protein 3(IGFBP3)       |
| IGFBP6  | 3489   | insulin like growth factor binding protein 6(IGFBP6)       |
| IGFBPL1 | 347252 | insulin like growth factor binding protein like 1(IGFBPL1) |
| IL11    | 3589   | interleukin 11(IL11)                                       |
| IL11RA  | 3590   | interleukin 11 receptor subunit alpha(IL11RA)              |
| IL12B   | 3593   | interleukin 12B(IL12B)                                     |
| IL16    | 3603   | interleukin 16(IL16)                                       |
| IL1B    | 3553   | interleukin 1 beta(IL1B)                                   |
| IL1RN   | 3557   | interleukin 1 receptor antagonist(IL1RN)                   |
| IL20RA  | 53832  | interleukin 20 receptor subunit alpha(IL20RA)              |
| IL24    | 11009  | interleukin 24(IL24)                                       |
| IL5RA   | 3568   | interleukin 5 receptor subunit alpha(IL5RA)                |
| IL6     | 3569   | interleukin 6(IL6)                                         |
| IL9     | 3578   | interleukin 9(IL9)                                         |
| INHA    | 3623   | inhibin subunit alpha(INHA)                                |
| IPPK    | 64768  | inositol-pentakisphosphate 2-kinase(IPPK)                  |
| ISCA1   | 81689  | iron-sulfur cluster assembly 1(ISCA1)                      |
| ITGB3   | 3690   | integrin subunit beta 3(ITGB3)                             |

|           |           |                                                                                               |
|-----------|-----------|-----------------------------------------------------------------------------------------------|
| ITGB4     | 3691      | integrin subunit beta 4(ITGB4)                                                                |
| ITGB6     | 3694      | integrin subunit beta 6(ITGB6)                                                                |
| IZUMO3    | 100129669 | IZUMO family member 3(IZUMO3)                                                                 |
| JAK2      | 3717      | Janus kinase 2(JAK2)                                                                          |
| KCNQ1     | 3784      | potassium voltage-gated channel subfamily Q member 1(KCNQ1)                                   |
| KIF24     | 347240    | kinesin family member 24(KIF24)                                                               |
| KIF27     | 55582     | kinesin family member 27(KIF27)                                                               |
| KIR2DL1   | 3802      | killer cell immunoglobulin like receptor, two Ig domains and long cytoplasmic tail 1(KIR2DL1) |
| KIR2DL2   | 3803      | killer cell immunoglobulin like receptor, two Ig domains and long cytoplasmic tail 2(KIR2DL2) |
| KLF9      | 687       | KLF transcription factor 9(KLF9)                                                              |
| KLHL9     | 55958     | kelch like family member 9(KLHL9)                                                             |
| KLK10     | 5655      | kallikrein related peptidase 10(KLK10)                                                        |
| LAMA4     | 3910      | laminin subunit alpha 4(LAMA4)                                                                |
| LGALS14   | 56891     | galectin 14(LGALS14)                                                                          |
| LGALS3    | 3958      | galectin 3(LGALS3)                                                                            |
| LIF       | 3976      | LIF interleukin 6 family cytokine(LIF)                                                        |
| LINC00537 | 203274    | long intergenic non-protein coding RNA 537(LINC00537)                                         |
| LINC02872 | 401535    | long intergenic non-protein coding RNA 2872(LINC02872)                                        |
| LINGO2    | 158038    | leucine rich repeat and Ig domain containing 2(LINGO2)                                        |
| LMNA      | 4000      | lamin A/C(LMNA)                                                                               |
| LONP1     | 9361      | lon peptidase 1, mitochondrial(LONP1)                                                         |
| LRRC19    | 64922     | leucine rich repeat containing 19(LRRC19)                                                     |
| LRRC56    | 115399    | leucine rich repeat containing 56(LRRC56)                                                     |
| LURAP1L   | 286343    | leucine rich adaptor protein 1 like(LURAP1L)                                                  |
| MAMDC2    | 256691    | MAM domain containing 2(MAMDC2)                                                               |
| MAP2      | 4133      | microtubule associated protein 2(MAP2)                                                        |
| MAPRE3    | 22924     | microtubule associated protein RP/EB family member 3(MAPRE3)                                  |
| MBL2      | 4153      | mannose binding lectin 2(MBL2)                                                                |
| MCIDAS    | 345643    | multiciliate differentiation and DNA synthesis associated cell cycle protein(MCIDAS)          |
| MELK      | 9833      | maternal embryonic leucine zipper kinase(MELK)                                                |
| MFSD14B   | 84641     | major facilitator superfamily domain containing 14B(MFSD14B)                                  |
| MGAT2     | 4247      | alpha-1,6-mannosyl-glycoprotein 2-beta-N-acetylglucosaminyltransferase(MGAT2)                 |
| MGP       | 4256      | matrix Gla protein(MGP)                                                                       |
| MIR204    | 406987    | microRNA 204(MIR204)                                                                          |
| MIR23B    | 407011    | microRNA 23b(MIR23B)                                                                          |
| MIR24-1   | 407012    | microRNA 24-1(MIR24-1)                                                                        |
| MIR27B    | 407019    | microRNA 27b(MIR27B)                                                                          |
| MIR31     | 407035    | microRNA 31(MIR31)                                                                            |
| MIR7-1    | 407043    | microRNA 7-1(MIR7-1)                                                                          |



|           |        |                                                                  |
|-----------|--------|------------------------------------------------------------------|
| MIRLET7A1 | 406881 | microRNA let-7a-1(MIRLET7A1)                                     |
| MIRLET7D  | 406886 | microRNA let-7d(MIRLET7D)                                        |
| MIRLET7F1 | 406888 | microRNA let-7f-1(MIRLET7F1)                                     |
| MLLT3     | 4300   | MLLT3 super elongation complex subunit(MLLT3)                    |
| MMP11     | 4320   | matrix metalloproteinase 11(MMP11)                               |
| MMP12     | 4321   | matrix metalloproteinase 12(MMP12)                               |
| MMP15     | 4324   | matrix metalloproteinase 15(MMP15)                               |
| MMP19     | 4327   | matrix metalloproteinase 19(MMP19)                               |
| MMP26     | 56547  | matrix metalloproteinase 26(MMP26)                               |
| MMP7      | 4316   | matrix metalloproteinase 7(MMP7)                                 |
| MOB3B     | 79817  | MOB kinase activator 3B(MOB3B)                                   |
| MPDZ      | 8777   | multiple PDZ domain crumbs cell polarity complex component(MPDZ) |
| MPL       | 4352   | MPL proto-oncogene, thrombopoietin receptor(MPL)                 |
| MSMP      | 692094 | microseminoprotein, prostate associated(MSMP)                    |
| MTAP      | 4507   | methylthioadenosine phosphorylase(MTAP)                          |
| MTHFR     | 4524   | methylenetetrahydrofolate reductase(MTHFR)                       |
| MTMR14    | 64419  | myotubularin related protein 14(MTMR14)                          |
| MUC4      | 4585   | mucin 4, cell surface associated(MUC4)                           |
| MYF6      | 4618   | myogenic factor 6(MYF6)                                          |
| MYORG     | 57462  | myogenesis regulating glycosidase (putative)(MYORG)              |
| NAA35     | 60560  | N-alpha-acetyltransferase 35, NatC auxiliary subunit(NAA35)      |
| NANS      | 54187  | N-acetylneuraminase synthase(NANS)                               |
| NCAM1     | 4684   | neural cell adhesion molecule 1(NCAM1)                           |
| NCBP1     | 4686   | nuclear cap binding protein subunit 1(NCBP1)                     |
| NCR1      | 9437   | natural cytotoxicity triggering receptor 1(NCR1)                 |
| NCR2      | 9436   | natural cytotoxicity triggering receptor 2(NCR2)                 |
| NCR3      | 259197 | natural cytotoxicity triggering receptor 3(NCR3)                 |
| NDUFB6    | 4712   | NADH: ubiquinone oxidoreductase subunit B6(NDUFB6)               |
| NFIB      | 4781   | nuclear factor I B(NFIB)                                         |
| NFIL3     | 4783   | nuclear factor, interleukin 3 regulated(NFIL3)                   |
| NFX1      | 4799   | nuclear transcription factor, X-box binding 1(NFX1)              |
| NINJ1     | 4814   | ninjurin 1(NINJ1)                                                |
| NME8      | 51314  | NME/NM23 family member 8(NME8)                                   |
| NMRK1     | 54981  | nicotinamide riboside kinase 1(NMRK1)                            |
| NOL6      | 65083  | nucleolar protein 6(NOL6)                                        |
| NOL8      | 55035  | nucleolar protein 8(NOL8)                                        |
| NOS3      | 4846   | nitric oxide synthase 3(NOS3)                                    |
| NPR2      | 4882   | natriuretic peptide receptor 2(NPR2)                             |
| NTRK2     | 4915   | neurotrophic receptor tyrosine kinase 2(NTRK2)                   |
| NUDT2     | 318    | nudix hydrolase 2(NUDT2)                                         |
| NUTM2F    | 54754  | NUT family member 2F(NUTM2F)                                     |

|         |        |                                                                                      |
|---------|--------|--------------------------------------------------------------------------------------|
| NUTM2G  | 441457 | NUT family member 2G(NUTM2G)                                                         |
| NXNL2   | 158046 | nucleoredoxin like 2(NXNL2)                                                          |
| ODAD1   | 93233  | outer dynein arm docking complex subunit 1(ODAD1)                                    |
| ODAD2   | 55130  | outer dynein arm docking complex subunit 2(ODAD2)                                    |
| ODAD3   | 115948 | outer dynein arm docking complex subunit 3(ODAD3)                                    |
| ODAD4   | 83538  | outer dynein arm docking complex subunit 4(ODAD4)                                    |
| OFD1    | 8481   | OFD1 centriole and centriolar satellite protein(OFD1)                                |
| OGN     | 4969   | osteoglycin(OGN)                                                                     |
| OMD     | 4958   | osteomodulin(OMD)                                                                    |
| OR13J1  | 392309 | olfactory receptor family 13 subfamily J member 1(OR13J1)                            |
| OR2S2   | 56656  | olfactory receptor family 2 subfamily S member 2(OR2S2)                              |
| OSTF1   | 26578  | osteoclast stimulating factor 1(OSTF1)                                               |
| PABIR1  | 116224 | PP2A Aalpha (PPP2R1A) and B55A (PPP2R2A) interacting phosphatase regulator 1(PABIR1) |
| PAEP    | 5047   | progesterone associated endometrial protein(PAEP)                                    |
| PAPPA   | 5069   | pappalysin 1(PAPPA)                                                                  |
| PAX5    | 5079   | paired box 5(PAX5)                                                                   |
| PCA3    | 50652  | prostate cancer associated 3(PCA3)                                                   |
| PCDHA3  | 56145  | protocadherin alpha 3(PCDHA3)                                                        |
| PCSK5   | 5125   | proprotein convertase subtilisin/kexin type 5(PCSK5)                                 |
| PGF     | 5228   | placental growth factor(PGF)                                                         |
| PGM5    | 5239   | phosphoglucomutase 5(PGM5)                                                           |
| PGR     | 5241   | progesterone receptor(PGR)                                                           |
| PHF2    | 5253   | PHD finger protein 2(PHF2)                                                           |
| PHF24   | 23349  | PHD finger protein 24(PHF24)                                                         |
| PIF1    | 80119  | PIF1 5'-to-3' DNA helicase(PIF1)                                                     |
| PIGO    | 84720  | phosphatidylinositol glycan anchor biosynthesis class O(PIGO)                        |
| PIP5K1B | 8395   | phosphatidylinositol-4-phosphate 5-kinase type 1 beta(PIP5K1B)                       |
| PLAA    | 9373   | phospholipase A2 activating protein(PLAA)                                            |
| PLIN2   | 123    | perilipin 2(PLIN2)                                                                   |
| PLK1    | 5347   | polo like kinase 1(PLK1)                                                             |
| POLR1E  | 64425  | RNA polymerase I subunit E(POLR1E)                                                   |
| POMC    | 5443   | proopiomelanocortin(POMC)                                                            |
| PRKACG  | 5568   | protein kinase cAMP-activated catalytic subunit gamma(PRKACG)                        |
| PRLR    | 5618   | prolactin receptor(PRLR)                                                             |
| PRSS3   | 5646   | serine protease 3(PRSS3)                                                             |
| PRSS47P | 138652 | serine protease 47, pseudogene(PRSS47P)                                              |
| PRUNE2  | 158471 | prune homolog 2 with BCH domain(PRUNE2)                                              |
| PRXL2C  | 195827 | peroxiredoxin like 2C(PRXL2C)                                                        |
| PSAT1   | 29968  | phosphoserine aminotransferase 1(PSAT1)                                              |
| PSIP1   | 11168  | PC4 and SRSF1 interacting protein 1(PSIP1)                                           |
| PTAR1   | 375743 | protein prenyltransferase alpha subunit repeat containing 1(PTAR1)                   |

|          |        |                                                                      |
|----------|--------|----------------------------------------------------------------------|
| PTCH1    | 5727   | patched 1(PTCH1)                                                     |
| PTGIS    | 5740   | prostaglandin I2 synthase(PTGIS)                                     |
| PTHLH    | 5744   | parathyroid hormone like hormone(PTHLH)                              |
| PTPDC1   | 138639 | protein tyrosine phosphatase domain containing 1(PTPDC1)             |
| RASEF    | 158158 | RAS and EF-hand domain containing(RASEF)                             |
| RBP4     | 5950   | retinol binding protein 4(RBP4)                                      |
| RECK     | 8434   | reversion inducing cysteine rich protein with kazal motifs(RECK)     |
| REXO4    | 57109  | REX4 homolog, 3'-5' exonuclease(REXO4)                               |
| RFK      | 55312  | riboflavin kinase(RFK)                                               |
| RGP1     | 9827   | RGP1 homolog, RAB6A GEF complex partner 1(RGP1)                      |
| RMI1     | 80010  | RecQ mediated genome instability 1(RMI1)                             |
| RMRP     | 6023   | RNA component of mitochondrial RNA processing endoribonuclease(RMRP) |
| RNF38    | 152006 | ring finger protein 38(RNF38)                                        |
| ROR2     | 4920   | receptor tyrosine kinase like orphan receptor 2(ROR2)                |
| RORB     | 6096   | RAR related orphan receptor B(RORB)                                  |
| RPGR     | 6103   | retinitis pigmentosa GTPase regulator(RPGR)                          |
| RPP25L   | 138716 | ribonuclease P/MRP subunit p25 like(RPP25L)                          |
| RPS6     | 6194   | ribosomal protein S6(RPS6)                                           |
| RRAGA    | 10670  | Ras related GTP binding A(RRAGA)                                     |
| RSPH1    | 89765  | radial spoke head component 1(RSPH1)                                 |
| RSPH3    | 83861  | radial spoke head 3(RSPH3)                                           |
| RSPH4A   | 345895 | radial spoke head component 4A(RSPH4A)                               |
| RSPH9    | 221421 | radial spoke head component 9(RSPH9)                                 |
| RUSC2    | 9853   | RUN and SH3 domain containing 2(RUSC2)                               |
| RYR1     | 6261   | ryanodine receptor 1(RYR1)                                           |
| S1PR3    | 1903   | sphingosine-1-phosphate receptor 3(S1PR3)                            |
| S1PR3    | 1903   | sphingosine-1-phosphate receptor 3(S1PR3)                            |
| SAXO1    | 158297 | stabilizer of axonemal microtubules 1(SAXO1)                         |
| SDF2L1   | 23753  | stromal cell derived factor 2 like 1(SDF2L1)                         |
| SECISBP2 | 79048  | SECIS binding protein 2(SECISBP2)                                    |
| SEMA4D   | 10507  | semaphorin 4D(SEMA4D)                                                |
| SERPINB3 | 6317   | serpin family B member 3(SERPINB3)                                   |
| SERPINB4 | 6318   | serpin family B member 4(SERPINB4)                                   |
| SERPINC1 | 462    | serpin family C member 1(SERPINC1)                                   |
| SERPINE1 | 5054   | serpin family E member 1(SERPINE1)                                   |
| SH3GL2   | 6456   | SH3 domain containing GRB2 like 2, endophilin A1(SH3GL2)             |
| SHB      | 6461   | SH2 domain containing adaptor protein B(SHB)                         |
| SHC3     | 53358  | SHC adaptor protein 3(SHC3)                                          |
| SIGMAR1  | 10280  | sigma non-opioid intracellular receptor 1(SIGMAR1)                   |
| SIT1     | 27240  | signaling threshold regulating transmembrane adaptor 1(SIT1)         |
| SLC24A2  | 25769  | solute carrier family 24 member 2(SLC24A2)                           |

|           |        |                                                               |
|-----------|--------|---------------------------------------------------------------|
| SLC25A51  | 92014  | solute carrier family 25 member 51(SLC25A51)                  |
| SLC28A3   | 64078  | solute carrier family 28 member 3(SLC28A3)                    |
| SLC35D2   | 11046  | solute carrier family 35 member D2(SLC35D2)                   |
| SMC5      | 23137  | structural maintenance of chromosomes 5(SMC5)                 |
| SMU1      | 55234  | SMU1 DNA replication regulator and spliceosomal factor(SMU1)  |
| SNAPC3    | 6619   | small nuclear RNA activating complex polypeptide 3(SNAPC3)    |
| SPAG1     | 6674   | sperm associated antigen 1(SPAG1)                             |
| SPAG5     | 10615  | sperm associated antigen 5(SPAG5)                             |
| SPAG8     | 26206  | sperm associated antigen 8(SPAG8)                             |
| SPATA31A1 | 647060 | SPATA31 subfamily A member 1(SPATA31A1)                       |
| SPATA31A3 | 727830 | SPATA31 subfamily A member 3(SPATA31A3)                       |
| SPATA31A5 | 727905 | SPATA31 subfamily A member 5(SPATA31A5)                       |
| SPATA31A6 | 389730 | SPATA31 subfamily A member 6(SPATA31A6)                       |
| SPATA31A7 | 26165  | SPATA31 subfamily A member 7(SPATA31A7)                       |
| SPATA31C1 | 441452 | SPATA31 subfamily C member 1(SPATA31C1)                       |
| SPATA31C2 | 645961 | SPATA31 subfamily C member 2(SPATA31C2)                       |
| SPATA31D1 | 389763 | SPATA31 subfamily D member 1(SPATA31D1)                       |
| SPATA31D3 | 389762 | SPATA31 subfamily D member 3(SPATA31D3)                       |
| SPATA31D4 | 389761 | SPATA31 subfamily D member 4(SPATA31D4)                       |
| SPATA31E1 | 286234 | SPATA31 subfamily E member 1(SPATA31E1)                       |
| SPIN1     | 83985  | SPNS lysolipid transporter 1, lysophospholipid(SPNS1)         |
| SPIN1     | 10927  | spindlin 1(SPIN1)                                             |
| SPINK4    | 27290  | serine peptidase inhibitor Kazal type 4(SPINK4)               |
| SPTLC1    | 10558  | serine palmitoyltransferase long chain base subunit 1(SPTLC1) |
| SST       | 6750   | somatostatin(SST)                                             |
| STK36     | 27148  | serine/threonine kinase 36(STK36)                             |
| STOML2    | 30968  | stomatin like 2(STOML2)                                       |
| SUSD3     | 203328 | sushi domain containing 3(SUSD3)                              |
| SYCP3     | 50511  | synaptonemal complex protein 3(SYCP3)                         |
| SYK       | 6850   | spleen associated tyrosine kinase(SYK)                        |
| TAF1L     | 138474 | TATA-box binding protein associated factor 1 like(TAF1L)      |
| TBC1D2    | 55357  | TBC1 domain family member 2(TBC1D2)                           |
| TDRD7     | 23424  | tudor domain containing 7(TDRD7)                              |
| TEK       | 7010   | TEK receptor tyrosine kinase(TEK)                             |
| TESK1     | 7016   | testis associated actin remodelling kinase 1(TESK1)           |
| TFRC      | 7037   | transferrin receptor(TFRC)                                    |
| TGFB1     | 7040   | transforming growth factor beta 1(TGFB1)                      |
| TGFBI     | 7045   | transforming growth factor beta induced(TGFBI)                |
| TGFBR1    | 7046   | transforming growth factor beta receptor 1(TGFBR1)            |
| THPO      | 7066   | thrombopoietin(THPO)                                          |
| TIMP2     | 7077   | TIMP metalloproteinase inhibitor 2(TIM2)                      |

|          |        |                                                                         |
|----------|--------|-------------------------------------------------------------------------|
| TIMP3    | 7078   | TIMP metallopeptidase inhibitor 3(TIMP3)                                |
| TJP2     | 9414   | tight junction protein 2(TJP2)                                          |
| TLE1     | 7088   | TLE family member 1, transcriptional corepressor(TLE1)                  |
| TLE4     | 7091   | TLE family member 4, transcriptional corepressor(TLE4)                  |
| TLN1     | 7094   | talin 1(TLN1)                                                           |
| TMC1     | 117531 | transmembrane channel like 1(TMC1)                                      |
| TMEM215  | 401498 | transmembrane protein 215(TMEM215)                                      |
| TMEM252  | 169693 | transmembrane protein 252(TMEM252)                                      |
| TMEM8B   | 51754  | transmembrane protein 8B(TMEM8B)                                        |
| TMOD1    | 7111   | tropomodulin 1(TMOD1)                                                   |
| TNFRSF1A | 7132   | TNF receptor superfamily member 1A(TNFRSF1A)                            |
| TNFSF10  | 8743   | TNF superfamily member 10(TNFSF10)                                      |
| TNFSF13  | 8741   | TNF superfamily member 13(TNFSF13)                                      |
| TNR      | 7143   | tenascin R(TNR)                                                         |
| TOMM5    | 401505 | translocase of outer mitochondrial membrane 5(TOMM5)                    |
| TOPORS   | 10210  | TOP1 binding arginine/serine rich protein, E3 ubiquitin ligase(TOPORS)  |
| TPM2     | 7169   | tropomyosin 2(TPM2)                                                     |
| TRAF1    | 7185   | TNF receptor associated factor 1(TRAF1)                                 |
| TRIM14   | 9830   | tripartite motif containing 14(TRIM14)                                  |
| TRMO     | 51531  | tRNA methyltransferase O(TRMO)                                          |
| TRMT10B  | 158234 | tRNA methyltransferase 10B(TRMT10B)                                     |
| TRPM3    | 80036  | transient receptor potential cation channel subfamily M member 3(TRPM3) |
| TRPM6    | 140803 | transient receptor potential cation channel subfamily M member 6(TRPM6) |
| TSTD2    | 158427 | thiosulfate sulfurtransferase like domain containing 2(TSTD2)           |
| TTC39B   | 158219 | tetratricopeptide repeat domain 39B(TTC39B)                             |
| TUSC1    | 286319 | tumor suppressor candidate 1(TUSC1)                                     |
| TUT7     | 79670  | terminal uridylyl transferase 7(TUT7)                                   |
| TYMS     | 7298   | thymidylate synthetase(TYMS)                                            |
| TYRP1    | 7306   | tyrosinase related protein 1(TYRP1)                                     |
| UBAP1    | 51271  | ubiquitin associated protein 1(UBAP1)                                   |
| UBAP2    | 55833  | ubiquitin associated protein 2(UBAP2)                                   |
| UBE2R2   | 54926  | ubiquitin conjugating enzyme E2 R2(UBE2R2)                              |
| UBQLN1   | 29979  | ubiquilin 1(UBQLN1)                                                     |
| UNC13B   | 10497  | unc-13 homolog B(UNC13B)                                                |
| VCP      | 7415   | valosin containing protein(VCP)                                         |
| VPS13A   | 23230  | vacuolar protein sorting 13 homolog A(VPS13A)                           |
| WNK2     | 65268  | WNK lysine deficient protein kinase 2(WNK2)                             |
| WRN      | 7486   | WRN RecQ like helicase(WRN)                                             |
| XIST     | 7503   | X inactive specific transcript(XIST)                                    |
| XPA      | 7507   | XPA, DNA damage recognition and repair factor(XPA)                      |
| ZBTB5    | 9925   | zinc finger and BTB domain containing 5(ZBTB5)                          |

|         |        |                                                        |
|---------|--------|--------------------------------------------------------|
| ZCCHC7  | 84186  | zinc finger CCHC-type containing 7(ZCCHC7)             |
| ZDHHC21 | 340481 | zinc finger DHHC-type palmitoyltransferase 21(ZDHHC21) |
| ZFAND5  | 7763   | zinc finger AN1-type containing 5(ZFAND5)              |
| ZMYND10 | 51364  | zinc finger MYND-type containing 10(ZMYND10)           |
| ZNF169  | 169841 | zinc finger protein 169(ZNF169)                        |
| ZNF367  | 195828 | zinc finger protein 367(ZNF367)                        |
| ZNF484  | 83744  | zinc finger protein 484(ZNF484)                        |
| ZNF510  | 22869  | zinc finger protein 510(ZNF510)                        |
| ZNF658  | 26149  | zinc finger protein 658(ZNF658)                        |
| ZNF782  | 158431 | zinc finger protein 782(ZNF782)                        |
| ZNG1C   | 445571 | Zn regulated GTPase metalloprotein activator 1C(ZNG1C) |
| ZNG1F   | 644019 | Zn regulated GTPase metalloprotein activator 1F(ZNG1F) |

---

List of potential gene of abortion and miscarriage relate gene based in ClinVar, Disgenet, Monarch database

**Supplementary Table S2. Details of Sanger sequencing for polymerase chain reaction**

| position        | Gene    | Name          | Primer sequence ( 5' -> 3' ) |
|-----------------|---------|---------------|------------------------------|
| chr2:233274367  | ALPG    | rs575918099_F | ACTGAAACTGAACCCTCCAA         |
|                 |         | rs575918099_R | CCAGCAGAGGAAGCAACG           |
| chr2:238283646  | COL6A3  | rs116238578_F | ACGTCCTGCTTGTTTCATGTA        |
|                 |         | rs116238578_R | AATTGCTGCTCTGATGTCCT         |
| chr3:195488449  | MUC4    | rs200737893_F | GCACAGATTCCTCAGACCTT         |
|                 |         | rs200737893_R | GGCCAACCTCCCACTCTG           |
| chr10:115334164 | HABP2   | rs542838125_F | AGACACATGATTCTCCTGCG         |
|                 |         | rs542838125_R | ATACACTCCGCTCTGACCTT         |
| chr17:34074883  | GAS2L2  | rs140842796_F | CTGTACTGTGCCCCAACTACT        |
|                 |         | rs140842796_R | ATGTGATGGTACGTGTAGGG         |
| chr19:10897280  | DNM2    | rs763894364_F | CTGTCTCTCAAGGCTGTGTG         |
|                 |         | rs763894364_R | TGAGTGGACGAGTGATGAGT         |
| chr20:48130848  | PTGIS   | rs13306027_F  | TGCCAGGTGTGTGAAGATAG         |
|                 |         | rs13306027_R  | CTTGCAGGGGAATATGGGTC         |
| chr20:52789538  | CYP24A1 | rs114476330_F | CGCCTCTTCACAATTTCCAG         |
|                 |         | rs114476330_R | GTATGGCAAGATTTTCCGCA         |
| chr16:16276686  | ABCC6   | rs758166222_F | GGTGAGAGGTGGAGAGAATG         |
|                 |         | rs758166222_R | TGCGTGTCCAGAATAAACCT         |
| chr16:16276686  | ABCC6   | rs527236047_F | CTTCCCTCTCCTCTGCAAAT         |
|                 |         | rs527236047_R | TGGCCGAGAATGCTATGAAT         |
